# Supplementary material
Source: PubMed Central journal article supplement (PMC9839314)
Supplement: NIHMS1700422-supplement-Supplementary___Appendix__online_only_material__etc___2.pdf [file NIHMS1700422-supplement-Supplementary___Appendix__online_only_material__etc___2.pdf]

## SUPPLEMENT MATERIAL

### Actionable Variants Identified by Genome Sequencing: Penetrance and Near-Term Outcomes Following Return to Participants

Lee et al

| <b>Contents</b>                                                            | <b>Page</b> |
|----------------------------------------------------------------------------|-------------|
| Table 1. Relevant family history                                           | 2           |
| Table 2. A summary of actionable variants identified during the RAVE study | 3-13        |
| Table 3. Criteria for ascertaining penetrance                              | 14-15       |
| Table 4. Outcomes in participants with previously known diagnoses          | 16          |
| Detailed description of outcomes                                           | 17-28       |
| FH (including Table 5 and Fig. 1)                                          | 17-18       |
| Lynch Syndrome (including Table 6 and Fig. 2)                              | 19-20       |
| HBOC Syndrome (including Table 7 and Fig. 3)                               | 21-22       |
| Long QT/Brugada Syndrome (including Table 8 and Fig. 4)                    | 23-24       |
| Cardiomyopathy & ARVC (including Table 9)                                  | 25-26       |
| Hemochromatosis (including Table 10 and Fig. 5)                            | 26-27       |
| Other conditions                                                           | 27-28       |

**Table 1: Relevant Family History**

| Condition                                              | Related Diagnoses                                                                                               | Family history of Related Diagnosis |
|--------------------------------------------------------|-----------------------------------------------------------------------------------------------------------------|-------------------------------------|
| Familial Hypercholesterolemia<br>n = 18                | History of Hyperlipidemia and ASCVD                                                                             | 8                                   |
| Lynch Syndrome<br>n = 10                               | History of colorectal or endometrial cancer                                                                     | 4                                   |
| Hereditary Breast and Ovarian Cancer Syndrome<br>n = 8 | History of Breast or ovarian cancer                                                                             | 4                                   |
| Long Q-T syndrome<br>n=10                              | History of LQT syndrome diagnosis or prolonged QT interval                                                      | 0                                   |
| Cardiomyopathy/ARVC<br>n = 11                          | History of related cardiomyopathy                                                                               | 2                                   |
| Hemochromatosis<br>n = 9                               | History of hemochromatosis                                                                                      | 0                                   |
| Factor V Leiden<br>n = 4                               | History of recurrent thrombosis                                                                                 | 2                                   |
| <b>CHEK2</b><br>n= 2                                   | History of:<br>Breast cancer<br>Prostate cancer<br>Stomach cancer<br>Sarcoma<br>Kidney cancer                   | 2                                   |
| Familial Adenomatous Polyposis<br>n = 2                | History of FAP or extensive polyps or polyps leading to colectomy.                                              | 0                                   |
| <b>PALB2</b><br>n = 2                                  | History of breast cancer or pancreatic cancer                                                                   | 0                                   |
| Multiple Endocrine Neoplasia type IIA<br>n = 2         | History of:<br>MEN syndrome<br>Medullary thyroid carcinoma<br>Pheochromocytoma, Parathyroid adenoma/hyperplasia | 1                                   |
| Malignant hyperthermia<br>n = 1                        | History of malignant hyperthermia diagnosis.                                                                    | 0                                   |
| MCAD deficiency<br>n = 1                               | History of MCAD deficiency.                                                                                     | 0                                   |
| Ehlers-Danlos<br>n = 1                                 | History of:<br>Vascular type Ehlers-Danlos syndrome.<br>Arterial aneurysms, dissection, or rupture              | 1                                   |

ARVC= arrhythmogenic right ventricle cardiomyopathy

**Table 2. A summary of actionable variants identified during the RAVE study**

|                                      | Gene        | Variant                 | eMERGE Classification* | Relevant Traits | Manifestation                         | Comments                                                       | Tests Completed                                                      |
|--------------------------------------|-------------|-------------------------|------------------------|-----------------|---------------------------------------|----------------------------------------------------------------|----------------------------------------------------------------------|
| Tier 1 Variants                      |             |                         |                        |                 |                                       |                                                                |                                                                      |
| <i>Familial Hypercholesterolemia</i> |             |                         |                        |                 |                                       |                                                                |                                                                      |
| 1                                    | <i>LDLR</i> | c.796G>A (p.Asp266Asn)  | LP                     | +               | Hypercholesterolemia, LDL-C 184 mg/dL | Declined referral                                              | —                                                                    |
| 2                                    | <i>LDLR</i> | c.782G>T (p.Cys261Phe)  | LP                     | +               | Hypercholesterolemia, LDL-C 206 mg/dL | Seen in FH clinic                                              | Lipid Profile<br>Apo B level<br>Lipoprotein (a)                      |
| 3                                    | <i>LDLR</i> | c.796G>A (p.Asp266Asn)  | LP                     | -               | Hypercholesterolemia, LDL-C 146 mg/dL | Statin intolerant, declined referral                           | —                                                                    |
| 4                                    | <i>LDLR</i> | c.131G>A (p.Trp44*)     | P                      | +               | Hypercholesterolemia, LDL-C 218 mg/dL | Referred to FH clinic but did not follow up                    | Lipid Profile                                                        |
| 5                                    | <i>LDLR</i> | c.1444G>A (p.Asp482Asn) | LP                     | +               | Hypercholesterolemia, LDL-C 216 mg/dL | Declined referral                                              | —                                                                    |
| 6                                    | <i>LDLR</i> | c.862G>A (p.Glu288Lys)  | LP                     | +               | Hypercholesterolemia, LDL-C 198 mg/dL | Declined referral                                              | —                                                                    |
| 7                                    | <i>LDLR</i> | c.1444G>A (p.Asp482Asn) | LP                     | +               | Hypercholesterolemia, LDL-C 217 mg/dL | Opted to see PCP first                                         | Lipid Profile                                                        |
| 8                                    | <i>LDLR</i> | c.798T>A (p.Asp266Glu)  | LP                     | +               | Hypercholesterolemia, LDL-C 218 mg/dL | Referred to FH clinic but did not follow up                    | Lipid Profile                                                        |
| 9                                    | <i>LDLR</i> | c.1640T>C (p.Leu547Pro) | LP                     | +               | Hypercholesterolemia, LDL-C 348 mg/dL | Previous Dx of FH (genetic)                                    | Lipid Profile                                                        |
| 10                                   | <i>LDLR</i> | C.1474G>A (p.Asp492Asn) | LP                     | +               | Hypercholesterolemia, LDL-C 243 mg/dL | Seen in FH Clinic, statin dose increased and ezetimibe started | Lipid Profile<br>ECG<br>Echocardiography<br>Lipoprotein (a)<br>Apo B |
| 11                                   | <i>LDLR</i> | c.1432G>A (p.Gly478Arg) | LP                     | +               | Hypercholesterolemia, LDL-C 256 mg/dL | Seen in FH Clinic                                              | Lipid Profile<br>ECG<br>Lipoprotein (a)<br>Apo B                     |
| 12                                   | <i>LDLR</i> | c.1860G>A (p.Trp620*)   | P                      | +               | Hypercholesterolemia, LDL-C 303 mg/dL | Declined referral                                              | —                                                                    |
| 13                                   | <i>LDLR</i> | c.796G>A (p.Asp266Asn)  | LP                     | +               | Hypercholesterolemia, LDL-C 196 mg/dL | Seen in FH Clinic                                              | Lipid Profile<br>ECG<br>Lipoprotein                                  |

|    |              |                              |     |   |                                        |                                                                                   | (a)<br>Apo B<br>CT coronary<br>calcium                                  |
|----|--------------|------------------------------|-----|---|----------------------------------------|-----------------------------------------------------------------------------------|-------------------------------------------------------------------------|
| 14 | <i>LDLR</i>  | c.420G>C<br>(p.Glu140Asp)    | LP  | + | Hypercholesterolemia, LDL-C 280 mg/dL  | Previous Dx of FH (genetic)<br>Declined FH clinic referral                        | —                                                                       |
| 15 | <i>LDLR</i>  | c.1586+5G>A                  | LP  | + | Hypercholesterolemia, LDL-C 162 mg/dL  | Opted to follow with PCP                                                          | —                                                                       |
| 16 | <i>LDLR</i>  | c.1238C>T(p.Thr413Met)       | LP  | + | Hypercholesterolemia, LDL-C 212 mg/dL  | Declined FH clinic referral                                                       | —                                                                       |
| 17 | <i>LDLR</i>  | c.1444G>A<br>(p.Asp482Asn)   | LP  | + | Hypercholesterolemia, LDL-C 308 mg/dL† | —                                                                                 | Lipid Profile                                                           |
| 18 | <i>LDLR</i>  | c.542C>G<br>(p.Pro181Arg)    | LP† | - | Hypercholesterolemia, LDL-C 159 mg/dL  | —                                                                                 | Lipid Profile                                                           |
| 19 | <i>LDLR</i>  | c.2029T>C<br>(p.Cys677Arg)   | LP  | + | Hypercholesterolemia, LDL-C 236 mg/dL  | —                                                                                 | —                                                                       |
| 20 | <i>APOB</i>  | c.10580G>A<br>(p.Arg3527Gln) | P   | + | Hypercholesterolemia, LDL-C 196 mg/dL  | —                                                                                 | Lipid Profile                                                           |
| 21 | <i>APOB</i>  | c.10580G>A<br>(p.Arg3527Gln) | P   | + | Hypercholesterolemia, LDL-C 217 mg/dL  | Seen in FH clinic                                                                 | Lipid Profile<br>ECG<br>Lipoprotein (a)<br>Apo B<br>CT coronary calcium |
| 22 | <i>APOB</i>  | c.10580G>A(p.Arg3527Gln)     | P   | + | Hypercholesterolemia, LDL-C 308 mg/dL‡ | Medications reviewed in FH clinic, PCSK 9 considered if LDL-C does not reach goal | Lipid Profile                                                           |
| 23 | <i>APOB</i>  | c.10580G>A(p.Arg3527Gln)     | P   | + | Hypercholesterolemia, LDL-C 210 mg/dL  | Already on high dose statin and ezetimibe<br>Declined referral                    | Lipid Profile                                                           |
| 24 | <i>APOB</i>  | c.10580G>A<br>(p.Arg3527Gln) | P   | + | Hypercholesterolemia, LDL-C 347 mg/dL  | Previous Dx of FH (genetic)                                                       | —                                                                       |
| 25 | <i>APOB</i>  | c.10580G>A<br>(p.Arg3527Gln) | P   | + | Hypercholesterolemia, LDL-C 194 mg/dL  | —                                                                                 | Lipid Profile                                                           |
| 26 | <i>PCSK9</i> | c.644G>A<br>(p.Arg215His)    | LP  | + | Hypercholesterolemia, LDL-C            | Seen in FH Clinic                                                                 | Lipid Profile<br>ECG                                                    |

|                                                                                                                                                                                                                                                                                                                                                                                                                                                                       |              |                                        |    |   |                                                 |                                                                              |                                                 |
|-----------------------------------------------------------------------------------------------------------------------------------------------------------------------------------------------------------------------------------------------------------------------------------------------------------------------------------------------------------------------------------------------------------------------------------------------------------------------|--------------|----------------------------------------|----|---|-------------------------------------------------|------------------------------------------------------------------------------|-------------------------------------------------|
|                                                                                                                                                                                                                                                                                                                                                                                                                                                                       |              |                                        |    |   | 315 mg/dL†                                      |                                                                              | Lipoprotein (a)<br>Apo B<br>CT coronary calcium |
| <p>FH = Familial Hypercholesterolemia; LDL-C = Calculated Low-Density Lipoprotein cholesterol (maximum level in the EHR); ; Apo B level = Apolipoprotein B; ECG = Electrocardiogram; CT = Cardiac computed tomography; *eMERGE classification matches ClinVar classification unless noted otherwise; † = 3 likely pathogenic, 2 variant of uncertain significance, and 1 likely benign classification in ClinVar; ‡ = Corrected LDL-C for lipid lowering therapy.</p> |              |                                        |    |   |                                                 |                                                                              |                                                 |
| <i>Hereditary Breast and Ovarian Cancer Syndrome</i>                                                                                                                                                                                                                                                                                                                                                                                                                  |              |                                        |    |   |                                                 |                                                                              |                                                 |
| 27                                                                                                                                                                                                                                                                                                                                                                                                                                                                    | <i>BRCA1</i> | c.2035A>T (p.Lys679*)                  | P  | + | —                                               | Previous genetic testing for family Hx<br>Previous BM+BSO                    | —                                               |
| 28                                                                                                                                                                                                                                                                                                                                                                                                                                                                    | <i>BRCA1</i> | deletion of exons 13-15                | P  | + | Personal history of breast cancer in early 30's | Previous genetic testing<br>Previous BM+BSO                                  | —                                               |
| 29                                                                                                                                                                                                                                                                                                                                                                                                                                                                    | <i>BRCA1</i> | c.5251C>T (p.Arg1751*)                 | P  | + | —                                               | Previous genetic testing<br>Previous BM+BSO                                  | —                                               |
| 30                                                                                                                                                                                                                                                                                                                                                                                                                                                                    | <i>BRCA1</i> | c.3756_3759delGTCT (p.Ser1253Argfs*10) | P  | + | —                                               | Previous genetic testing<br>Previous BM+BSO                                  | —                                               |
| 31                                                                                                                                                                                                                                                                                                                                                                                                                                                                    | <i>BRCA1</i> | c.3756_3759delGTCT (p.Ser1253Argfs*10) | P  | + | Personal history of breast cancer in mid 40's   | Previous genetic testing                                                     | —                                               |
| 32                                                                                                                                                                                                                                                                                                                                                                                                                                                                    | <i>BRCA1</i> | c.5109T>G (p.Tyr1703*)                 | P  | - | Strong family history of breast cancer          |                                                                              | MRI Breast Mammography                          |
| 33                                                                                                                                                                                                                                                                                                                                                                                                                                                                    | <i>BRCA1</i> | c.5096G>A (p.Arg1699Gln)               | LP | + | —                                               | Previous genetic Dx, previous Lynch Syndrome, previous TAH/BSO. Underwent BM | —                                               |
| 34                                                                                                                                                                                                                                                                                                                                                                                                                                                                    | <i>BRCA2</i> | c.5217_5223delTTTAA GT (p.Tyr1739*)    | P  | + | —                                               | BM+BSO after RoR                                                             | MRI breast US pelvis CA 125 level               |
| 35                                                                                                                                                                                                                                                                                                                                                                                                                                                                    | <i>BRCA2</i> | c.8168A>C (p.Asp2723Ala)               | LP | + | —                                               | Previous genetic testing, previous BM+BSO                                    | —                                               |

|    |              |                                           |    |    |                                                          |                                                                               |                                                                               |
|----|--------------|-------------------------------------------|----|----|----------------------------------------------------------|-------------------------------------------------------------------------------|-------------------------------------------------------------------------------|
| 36 | <i>BRCA2</i> | c.1813dup<br>(p.Ile605Asnfs*11)           | P  | +  | Personal history<br>of Breast cancer<br>in mid 40's      | Previous<br>genetic<br>testing<br>Previous BM<br>+BSO                         | —                                                                             |
| 37 | <i>BRCA2</i> | c.6033_6034delTT<br>(p.Ser2012Glnfs*5)    | P  | -  | —                                                        | Male<br>referred to<br>high risk<br>breast clinic<br>but did not<br>follow up | —                                                                             |
| 38 | <i>BRCA2</i> | c.4472_4475delTGAA<br>(p.Leu1491Glnfs*12) | P  | +  | —                                                        | Previous<br>genetic<br>testing<br>Previous BM                                 | —                                                                             |
| 39 | <i>BRCA2</i> | c.8243G>A<br>(p.Gly2748Asp)               | P  | -  | —                                                        | Male,<br>followed by<br>PCP                                                   | PSA                                                                           |
| 40 | <i>BRCA2</i> | c.6842-2A>G                               | LP | +  | Personal history<br>of prostate<br>cancer in mid<br>60's | Male                                                                          | PSA                                                                           |
| 41 | <i>BRCA2</i> | c.3847_3848del<br>(p.Val1283Lysfs*2)      | P  | -  | —                                                        | Male,<br>followed by<br>PCP                                                   | PSA<br>Prostate<br>Exam                                                       |
| 42 | <i>BRCA2</i> | c.6275_6276delTT<br>(p.Leu2092Profs*7)    | P  | +  | —                                                        | Previous<br>TAH BSO<br>for benign<br>tumor<br>Underwent<br>BM based on<br>ROR | MRI breast                                                                    |
| 43 | <i>BRCA2</i> | 9294C>G (p.Tyr3098*)                      | P  | -* | —                                                        | PCP<br>Male                                                                   | Surveillance:<br>Yearly<br>clinical<br>breast exam<br>PSA<br>Prostate<br>Exam |

BM = Bilateral Mastectomy; BSO = Bilateral Salpingo-Oophorectomy; TAH = Total Abdominal Hysterectomy; MRI = Magnetic Resonance Imaging; US = Ultrasound; CA 125 = cancer antigen 125; \*developed prostate cancer but > 1-year post RoR.

#### Lynch Syndrome

|    |             |                                       |   |   |              |                                                                                       |                    |
|----|-------------|---------------------------------------|---|---|--------------|---------------------------------------------------------------------------------------|--------------------|
| 44 | <i>MSH6</i> | c.2731C>T (p.Arg911*)                 | P | - | Colon polyps | Previous Dx<br>Lynch Syn.<br>(genetic)                                                | —                  |
| 45 | <i>MSH6</i> | c.3261_3262insC<br>(p.Phe1088Leufs*5) | P | - | —            | PCP follow-<br>up<br>Prior<br>hysterectom<br>y and BSO<br>due to<br>endometriosi<br>s | EGD<br>Colonoscopy |
| 46 | <i>MSH6</i> | c.32012C>T<br>(p.Arg1068*)            | P | - | —            | Referred to<br>GI neoplasia<br>clinic                                                 | —                  |

|    |             |                                              |     |   |                                                                                                     |                                                                 |                                                                |
|----|-------------|----------------------------------------------|-----|---|-----------------------------------------------------------------------------------------------------|-----------------------------------------------------------------|----------------------------------------------------------------|
|    |             |                                              |     |   |                                                                                                     | (pending)                                                       |                                                                |
| 47 | <i>MSH2</i> | Deletion Exons 1-3                           | P   | + | Personal history of colorectal cancer in early 30's<br>Paternal aunt had uterine cancer in mid 20's | Previously known genetic Dx                                     | —                                                              |
| 48 | <i>MSH2</i> | Del Exons 4-6                                | P   | + | Personal history of endometrial cancer in early 40's                                                | Previously known genetic Dx                                     | —                                                              |
| 49 | <i>PMS2</i> | c823C>T (p.Gln275*)                          | P   | - | Colon polyps                                                                                        | Referral to GI clinic                                           | EGD<br>Colonoscopy<br>PSA                                      |
| 50 | <i>PMS2</i> | c.2117delA (p.Lys706Serfs*10)                | P   | - | —                                                                                                   | TAH/BSO after RoR                                               | Colonoscopy<br>CT enterography<br>CT abdomen<br>Urine cytology |
| 51 | <i>PMS2</i> | c.325dup (p.Glu109Glyfs*30)                  | P   | - | —                                                                                                   | Previous TAH/BSO for uterine fibroids                           | EGD<br>Colonoscopy<br>Pelvis U/S                               |
| 52 | <i>PMS2</i> | c.614A>C (p.Gln205Pro)                       | LP* | - | Hyperplastic colon polyps                                                                           | Declined referral or further testing                            | —                                                              |
| 53 | <i>PMS2</i> | c.1939A>T (p.Lys647*)                        | P   | - | —                                                                                                   | GI neoplasia Clinic for ongoing management                      | Colonoscopy                                                    |
| 54 | <i>PMS2</i> | c.736_741delinsTGTGTGTGAAG (p.Pro246Cysfs*3) | P   | - | —                                                                                                   | TAH+BSO after RoR                                               | Transvaginal US<br>Endometrial sampling<br>Colonoscopy<br>EGD  |
| 55 | <i>PMS2</i> | c.400C>T (p.Arg134*)                         | P   | - | —                                                                                                   | Male Referred to the GI neoplasia clinic for further management | Colonoscopy<br>EGD                                             |
| 56 | <i>PMS2</i> | c.2113G>A (p.Glu705Lys)                      | LP  | - | —                                                                                                   | Female TAH+BSO based on RoR                                     | Urine cytology<br>Yearly colonoscopy                           |
| 57 | <i>PMS2</i> | c.1021delA (p.Arg341Glyfs*15)                | P   | + | Personal history of ovarian cancer (early 40's)                                                     | Female                                                          | —                                                              |
| 58 | <i>MLH1</i> | c.677G>T (p.Arg226Leu)                       | LP  | - | —                                                                                                   | Male                                                            | —                                                              |

CT = Computed tomography; TAH = total abdominal hysterectomy; BSO = bilateral salphingo-oophorectomy; EGD = esophagogastroduodenoscopy; LP\* = 3 Likely pathogenic and 3 variant of uncertain significance classifications in ClinVar

Non-Tier 1 Variants

*Familial Adenomatous Polyposis*

|    |            |                          |             |   |                                                      |                                             |                           |
|----|------------|--------------------------|-------------|---|------------------------------------------------------|---------------------------------------------|---------------------------|
| 59 | <i>APC</i> | c.694C>T (p.Arg232*)     | P           | + | FAP diagnosis                                        | Previous clinical Dx of FAP                 | —                         |
| 60 | <i>APC</i> | c.3920T>A (p.Ile1307Lys) | Risk Factor | - | Few adenomatous polyps, one with low grade dysplasia | Female in her late 60's. No referral needed | Colonoscopy every 5 years |
| 61 | <i>APC</i> | C.1262G>A (P.Trp421Ter)  | P           | - | Previously normal colonoscopy                        | Presumed mosaic                             | Endoscopy                 |

FAP = Familial Adenomatous Polyposis

*Hypertrophic Cardiomyopathy*

|    |               |                          |    |   |                                                                                                        |                                                             |                                                                      |
|----|---------------|--------------------------|----|---|--------------------------------------------------------------------------------------------------------|-------------------------------------------------------------|----------------------------------------------------------------------|
| 62 | <i>TNNI3</i>  | c.497C>T (p.Ser166Phe)   | P  | + | Hypertrophic cardiomyopathy diagnosis; Sigmoid ventricular septum with basal septal prominence (14 mm) | Seen in Hypertrophic Cardiomyopathy Clinic                  | cMRI<br>ECG<br>EST<br>Echocardiogram<br>24-h Holter                  |
| 63 | <i>TNNI3</i>  | c.484C>T (p.Arg162Trp)   | P  | - | —                                                                                                      | Seen in Hypertrophic Cardiomyopathy Clinic                  | Echocardiogram Strain<br>ECG                                         |
| 64 | <i>MYPBC3</i> | c1504C>T (p.Arg502Trp)   | P  | - | —                                                                                                      | Seen in Hypertrophic Cardiomyopathy Clinic                  | cMRI<br>Standard ECG<br>Echocardiogram                               |
| 65 | <i>MYPBC3</i> | c1504C>T (p.Arg502Trp)   | P  | - | —                                                                                                      | Seen in Hypertrophic Cardiomyopathy Clinic                  | Standard ECG<br>Echocardiogram<br>Signal-averaged ECG<br>24-h Holter |
| 66 | <i>MYPBC3</i> | c.905+1G>T               | LP | - | —                                                                                                      | Declined referral to the Hypertrophic Cardiomyopathy Clinic | —                                                                    |
| 67 | <i>MYH7</i>   | c.4499G>A (p.Arg1500Gln) | LP | - | —                                                                                                      | Referred to Hypertrophic Cardiomyopathy clinic but did not  | —                                                                    |



|                                                                                                                                               |              |                               |     |   |                                            |                                                                                       |                                                          |
|-----------------------------------------------------------------------------------------------------------------------------------------------|--------------|-------------------------------|-----|---|--------------------------------------------|---------------------------------------------------------------------------------------|----------------------------------------------------------|
|                                                                                                                                               |              |                               |     |   |                                            | follow up                                                                             |                                                          |
| 68                                                                                                                                            | <i>MYL3</i>  | c.170C>G                      | LP* | - | —                                          | Seen in Hypertrophic Cardiomyopathy Clinic, also found to have <i>SCN5A</i> P variant | ECG<br>Echocardiogram<br>EST                             |
| cMRI = Cardiac Magnetic Resonance Imaging; ECG = Electrocardiogram; EST = Exercise stress test; * Downgraded later to VUS by eMERGE           |              |                               |     |   |                                            |                                                                                       |                                                          |
| <i>Arrhythmogenic Right Ventricular Cardiomyopathy</i>                                                                                        |              |                               |     |   |                                            |                                                                                       |                                                          |
| 69                                                                                                                                            | <i>DSC2</i>  | c.2125+1del                   | LP  | - | —                                          | Referred to cardiology                                                                | cMRI<br>ECG<br>EST<br>Echocardiogram<br>24-h Holter      |
| 70                                                                                                                                            | <i>PKP2</i>  | c.275T>A (p.Leu92*)           | P   | - | —                                          | Referred to cardiology                                                                | cMRI<br>ECG<br>EST<br>Signal-averaged ECG<br>24-h Holter |
| 71                                                                                                                                            | <i>PKP2</i>  | c.1162C>T (p.Arg388Trp)       | LP  | - | Previous ECG and echocardiogram normal     | Declined referral                                                                     | —                                                        |
| 72                                                                                                                                            | <i>PKP2</i>  | c.235C>T (p.Arg79*)           | P   | - | —                                          | —                                                                                     | —                                                        |
| 73                                                                                                                                            | <i>DSP</i>   | c.597_598insGTAA (p.Arg199fs) | LP  | - | —                                          | Referred to cardiology                                                                | ECG<br>Signal-averaged ECG<br>24-h Holter                |
| 74                                                                                                                                            | <i>DSP</i>   | c.2794-2A>T                   | LP  | - | —                                          | —                                                                                     | —                                                        |
| cMRI = Cardiac Magnetic Resonance Imaging; ECG = Electrocardiogram; EST = Exercise stress test; ECHO = Echocardiogram; EP = Electrophysiology |              |                               |     |   |                                            |                                                                                       |                                                          |
| <i>Long QT/Brugada Syndrome</i>                                                                                                               |              |                               |     |   |                                            |                                                                                       |                                                          |
| 75                                                                                                                                            | <i>KCNQ1</i> | c.1893dup (p.Arg632Glnfs*20)  | P   | - | Normal QTc interval (QTc= 401 ms - 434 ms) | Referred to EP clinic but was not seen                                                | —                                                        |
| 76                                                                                                                                            | <i>KCNQ1</i> | c.1552C>T (p.Arg518*)         | P   | + | QTc interval (QTc= 455 ms - 517 ms)        | —                                                                                     | ECG<br>Echocardiogram<br>24-h Holter<br>EST              |
| 77                                                                                                                                            | <i>KCNQ1</i> | c.944A>G (p.Tyr315Cys)        | LP  | + | QTc interval (QTc= 412 ms - 490 ms)        | Previously diagnosed in EP clinic                                                     | —                                                        |
| 78                                                                                                                                            | <i>KCNQ1</i> | Del exons 4-7                 | P   | + | QTc interval (QTc= 453 ms -                | —                                                                                     | ECG<br>Echocardiogram                                    |

|                                                                                                                                                                                                                                              |               |                                  |    |   |                                                             |                                                                                                                                                            |                                                              |
|----------------------------------------------------------------------------------------------------------------------------------------------------------------------------------------------------------------------------------------------|---------------|----------------------------------|----|---|-------------------------------------------------------------|------------------------------------------------------------------------------------------------------------------------------------------------------------|--------------------------------------------------------------|
|                                                                                                                                                                                                                                              |               |                                  |    |   | 484 ms)                                                     |                                                                                                                                                            | m<br>24-h Holter<br>EST                                      |
| 79                                                                                                                                                                                                                                           | <i>KCNQ1</i>  | c.776G>A (p.Arg259His)           | LP | - | QTc interval<br>(QTc= 443 ms -<br>453 ms), Male             | Awaiting<br>EP<br>Review                                                                                                                                   | —                                                            |
| 80                                                                                                                                                                                                                                           | <i>KCNQ1</i>  | c.905C>T (p.Ala302Val)           | LP | - | —                                                           | —                                                                                                                                                          | —                                                            |
| 81                                                                                                                                                                                                                                           | <i>KCNE1</i>  | c.226G>A (p.Asp76Asn)            | LP | + | QT interval<br>(QTc= 420 ms -<br>519 ms)                    | Nadolol<br>started                                                                                                                                         | ECG, EST                                                     |
| 82                                                                                                                                                                                                                                           | <i>KCNE1</i>  | c.292C>T (p.Arg98Trp)            | P* | + | QT interval<br>(QTc= 447 ms -<br>495 ms)                    | Seen by<br>specialist                                                                                                                                      | ECG<br>Echocardiogra<br>m<br>24-h Holter<br>EST              |
| 83                                                                                                                                                                                                                                           | <i>SCN5A</i>  | c.4886G>A(p.Arg1629Gln)          | LP | - | No ECG<br>finding<br>consistent with<br>Brugada<br>syndrome | —                                                                                                                                                          | ECG<br>Brugada-<br>protocol ECG<br>Echocardiogra<br>m<br>EST |
| 84                                                                                                                                                                                                                                           | <i>SCN5A</i>  | c.3956G>T<br>(p.Gly1319Val)      | P  | - | No ECG<br>finding<br>consistent with<br>Brugada<br>syndrome | —                                                                                                                                                          | Brugada-<br>protocol ECG<br>24-h Holter<br>EST               |
| 85                                                                                                                                                                                                                                           | <i>KCNH2</i>  | c.1468G>A<br>(p.Ala490Thr)       | P  | - | QT interval<br>(QTc= 397 ms -<br>466 ms)                    | Referred<br>EP clinic<br>but not<br>seen                                                                                                                   | —                                                            |
| 86                                                                                                                                                                                                                                           | <i>KCNH2</i>  | c.446dupG<br>(p.Thr152Hisfs*180) | LP | + | QT interval<br>(QTc= 474 ms -<br>540 ms)                    | Previously<br>known to<br>EP                                                                                                                               | No change in<br>Mx<br>Previous<br>genetic Dx                 |
| 87                                                                                                                                                                                                                                           | <i>KCNH2</i>  | c.2762delG<br>(p.Gly921Alafs*53) | LP | + | QT interval<br>(QTc= 482 ms -<br>509 ms)                    | Seen in<br>EP clinic                                                                                                                                       | ECG<br>24-h Holter<br>EST                                    |
| ECG = Electrocardiogram; EST = Exercise stress test; TTE = Trans-thoracic Echocardiogram; EP =Electrophysiology; Mx = Management; P* = 1 pathogenic, 1 likely pathogenic, and 2 variant of uncertain significance classifications in ClinVar |               |                                  |    |   |                                                             |                                                                                                                                                            |                                                              |
| <i>Marfan Syndrome and Vascular Ehlers-Danlos Syndrome</i>                                                                                                                                                                                   |               |                                  |    |   |                                                             |                                                                                                                                                            |                                                              |
| 88                                                                                                                                                                                                                                           | <i>FBN1</i>   | c.2495G>A<br>(p.Cys832Tyr)       | P  | + | Marfan<br>Syndrome                                          | Clinical Dx<br>of Marfan<br>Syndrome                                                                                                                       | —                                                            |
| 89                                                                                                                                                                                                                                           | <i>COL3A1</i> | c.4087C>T<br>(p.Arg1363*)        | LP | - | Previous MRI<br>brain didn't<br>show<br>aneurysms           | Referred to<br>Clinical<br>Genomics<br>but did not<br>follow up<br>Daughter has<br>spontaneous<br>coronary<br>artery<br>dissection<br>and two<br>vertebral | —                                                            |

|                                   |            |                           |   |   |                                                             |                                                                             |                                                                            |
|-----------------------------------|------------|---------------------------|---|---|-------------------------------------------------------------|-----------------------------------------------------------------------------|----------------------------------------------------------------------------|
|                                   |            |                           |   |   |                                                             | aneurysms                                                                   |                                                                            |
| <i>Hereditary Hemochromatosis</i> |            |                           |   |   |                                                             |                                                                             |                                                                            |
| 90                                | <i>HFE</i> | c.845G>A<br>(p.Cys282Tyr) | P | - | Ferritin = 201<br>ng/mL                                     | PCP referral                                                                | —                                                                          |
| 91                                | <i>HFE</i> | c.845G>A<br>(p.Cys282Tyr) | P | + | (Ferritin = 83<br>ng/mL,<br>Transferritin<br>SAT = 58%)     | Started<br>therapy                                                          | Ferritin<br>MRI Liver                                                      |
| 92                                | <i>HFE</i> | c.845G>A<br>(p.Cys282Tyr) | P | + | (Ferritin = 405<br>ng/mL,<br>Transferritin<br>SAT = > 90 %) | Seen by<br>gastroenterol<br>ogy and<br>started<br>therapeutic<br>phlebotomy | Iron studies,<br>Liver<br>Enzymes,<br>Liver<br>Elastogram<br>w/o contrast  |
| 93                                | <i>HFE</i> | c.845G>A<br>(p.Cys282Tyr) | P | + | (Ferritin = 560<br>ng/mL,<br>Transferritin<br>SAT = 74%)    | PCP Referral                                                                | Annual<br>transferrin<br>saturation<br>and ferritin<br>level<br>monitoring |
| 94                                | <i>HFE</i> | c.845G>A<br>(p.Cys282Tyr) | P | + | (Ferritin = 444<br>ng/mL,<br>Transferritin<br>SAT = 72%)    | Started<br>therapy                                                          | Ferritin<br>MRI Liver                                                      |
| 95                                | <i>HFE</i> | c.845G>A<br>(p.Cys292Tyr) | P | + | Ferritin = 293<br>ng/mL                                     | —                                                                           | Previous<br>clinical<br>diagnosis<br>and genetic<br>testing                |
| 96                                | <i>HFE</i> | c.845G>A<br>(p.Cys282Tyr) | P | + | (Ferritin = 195<br>ng/mL,<br>Transferritin<br>SAT = 68%)    | Referred to<br>gastroenterol<br>ogy but not<br>yet seen                     | Iron studies                                                               |
| 97                                | <i>HFE</i> | c.845G>A<br>(p.Cys282Tyr) | P | + | (Ferritin = 904<br>ng/mL,<br>Transferritin<br>SAT = 68%)    | Started<br>therapy                                                          | Iron studies                                                               |
| 98                                | <i>HFE</i> | c.845G>A<br>(p.Cys282Tyr) | P | - | Ferritin = 67<br>ng/mL                                      | PCP<br>surveillance                                                         | —                                                                          |
| 99                                | <i>HFE</i> | c.845G>A<br>(p.Cys282Tyr) | P | - | (Ferritin = 150<br>ng/mL,<br>Transferritin<br>SAT = 50%)    | PCP<br>surveillance                                                         | Normal<br>ferritin and<br>transferrin                                      |
| 100                               | <i>HFE</i> | c.845G>A<br>(p.Cys282Tyr) | P | + | (Ferritin = 2<br>ng/mL,<br>Transferritin<br>SAT = 6%)       | Previous<br>clinical<br>diagnosis,<br>previous<br>therapy                   | —                                                                          |
| 101                               | <i>HFE</i> | c.845G>A<br>(p.Cys282Tyr) | P | - | (Ferritin = 109<br>ng/mL,<br>Transferritin<br>SAT = 34%)    | Previously<br>known                                                         | —                                                                          |
| 102                               | <i>HFE</i> | c.845G>A<br>(p.Cys282Tyr) | P | + | (Ferritin = 156<br>ng/mL,<br>Transferritin<br>SAT = 59%)    | Previously<br>known                                                         | —                                                                          |

|                                                                                    |              |                             |   |   |                                                                              |                                                                                                  |                                                                |
|------------------------------------------------------------------------------------|--------------|-----------------------------|---|---|------------------------------------------------------------------------------|--------------------------------------------------------------------------------------------------|----------------------------------------------------------------|
| 103                                                                                | <i>HFE</i>   | c.845G>A<br>(p.Cys282Tyr)   | P | + | (Ferritin = 133<br>ng/mL,<br>Transferritin<br>SAT = 62%)                     | Previously<br>known                                                                              | —                                                              |
| 104                                                                                | <i>HFE</i>   | c.845G>A<br>(p.Cys282Tyr)   | P | + | (Ferritin = 230<br>ng/mL,<br>Transferritin<br>SAT = > 90%)                   | Previously<br>known                                                                              | —                                                              |
| 105                                                                                | <i>HFE</i>   | c.845G>A<br>(p.Cys282Tyr)   | P | + | (Ferritin = 195<br>ng/mL,<br>Transferritin<br>SAT = 73%)                     | Previously<br>known                                                                              | —                                                              |
| MRI = Magnetic Resonance Imaging                                                   |              |                             |   |   |                                                                              |                                                                                                  |                                                                |
| <i>Malignant Hyperthermia</i>                                                      |              |                             |   |   |                                                                              |                                                                                                  |                                                                |
| 106                                                                                | <i>RYR1</i>  | c.1840C>T<br>(p.Arg614Cys)  | P | - | No previous<br>anesthesia<br>complications<br>(Succinylcholin<br>e was used) | EHR alert<br>was<br>implemented<br>to alert<br>anesthesiolo<br>gist                              | —                                                              |
| <i>Medium-Chain Acyl-CoA Dehydrogenase Deficiency</i>                              |              |                             |   |   |                                                                              |                                                                                                  |                                                                |
| 107                                                                                | <i>ACADM</i> | c.997A>G<br>(p.Lys333Glu)   | P | - | —                                                                            | Referred to<br>medical<br>geneticist<br>but did not<br>follow up                                 | —                                                              |
| <i>Multiple Endocrine Neoplasia Type II</i>                                        |              |                             |   |   |                                                                              |                                                                                                  |                                                                |
| 108                                                                                | <i>RET</i>   | c.2410G>A<br>(p.Val804met)  | P | - | —                                                                            | Seen by<br>endocrinolog<br>y                                                                     | US Thyroid,<br>PTH, Vit-D,<br>Calcitonin,<br>24hr urine<br>C/M |
| 109                                                                                | <i>RET</i>   | c.23705>T(p.Leu790Phe<br>)  | P | - | —                                                                            | Seen by<br>endocrinolog<br>y                                                                     | US Thyroid,<br>PTH, Vit-D,<br>Calcitonin,<br>24hr urine<br>C/M |
| US = Ultrasound; PTH = Parathyroid hormone; C/M = Catecholamines and Metanephrines |              |                             |   |   |                                                                              |                                                                                                  |                                                                |
| <i>Factor V Leiden</i>                                                             |              |                             |   |   |                                                                              |                                                                                                  |                                                                |
| 110                                                                                | <i>F5</i>    | c.1601G>A<br>(p.Arg534Gln)  | P | - | No Hx of VTE                                                                 | Also found<br>to have <i>RET</i><br>P variant                                                    | —                                                              |
| 111                                                                                | <i>F5</i>    | c.1601G>A(p.Arg534Gln)      | P | + | Hx of DVT                                                                    | Hx DVT,<br>referred to<br>thrombophili<br>a clinic and<br>started<br>prophylactic<br>rivaroxaban | —                                                              |
| 112                                                                                | <i>F5</i>    | c.1601G>A(p.Arg534Gln)      | P | - | No Hx of VTE                                                                 | PCP referral                                                                                     | —                                                              |
| 113                                                                                | <i>F5</i>    | c.1601G>A;<br>(p.Arg534Gln) | P | - | No Hx of VTE                                                                 | PCP referral<br>No Hx                                                                            | —                                                              |

|                                                                                   |                |                                   |    |   |                                                        |                                                     |                                                                              |
|-----------------------------------------------------------------------------------|----------------|-----------------------------------|----|---|--------------------------------------------------------|-----------------------------------------------------|------------------------------------------------------------------------------|
|                                                                                   |                |                                   |    |   |                                                        | DVT/PE                                              |                                                                              |
| DVT = Deep vein thrombosis; VTE = Venous thromboembolism; PE = Pulmonary embolism |                |                                   |    |   |                                                        |                                                     |                                                                              |
| <i>Breast and Pancreatic Cancer Risk</i>                                          |                |                                   |    |   |                                                        |                                                     |                                                                              |
| 114                                                                               | <i>PALB2</i>   | c.172_175delTTGT (p.Gln60Argfs*7) | P  | - | Hx of CRC<br>Mother had breast cancer in late 40's     | Male with Hx of CRC<br>Referred to Gastroenterology | Colonoscopy<br>Urine cytology<br>MRCP (ordered but not completed)<br>CA 19-9 |
| 115                                                                               | <i>PALB2</i>   | c.2748+1G>T                       | LP | + | Personal history of breast cancer (WLE, tamoxifen)     | Referred to Breast clinic<br>New genetic Dx         | Bilateral breast screening with tomosyntheses                                |
| CRC = Colorectal cancer; WLE = Wide Local Excision                                |                |                                   |    |   |                                                        |                                                     |                                                                              |
| <i>Cancer Risk</i>                                                                |                |                                   |    |   |                                                        |                                                     |                                                                              |
| 116                                                                               | <i>CHEK2</i>   | Del Exons 9-10                    | P  | + | Personal history of breast cancer early 50's           | Seen in Breast clinic                               | Breast MRI<br>Yearly mammogram                                               |
| 117                                                                               | <i>CHEK2</i>   | Del Exons 1-15                    | P  | + | Personal history of prostate cancer in mid 40's        | Male<br>No referral already being followed          | Colonoscopy every 5 years                                                    |
| <i>Hypokalemic Periodic Paralysis</i>                                             |                |                                   |    |   |                                                        |                                                     |                                                                              |
| 118                                                                               | <i>CACNA1S</i> | c.1583G>A (p.Arg528His)           | P  | + | Previous Clinical Dx of hypokalemic periodic paralysis | —                                                   | —                                                                            |

FH = Familial Hypercholesterolemia; P = Pathogenic; LP= Likely Pathogenic; BM = Bilateral mastectomy; BSO = Bilateral Salpingo-oophorectomy; HCM = Hypertrophic cardiomyopathy, ARVC = Arrhythmogenic right ventricular cardiomyopathy, LQTS = Long QT Syndrome; P\* or LP\* indicate that the eMERGE classification differed from consensus classification in ClinVar (B+LB+VUS classifications ≥ P+LP classifications).

**Table 3. Criteria for ascertaining penetrance**

| <b>Gene</b>                                                 | <b>Clinical diagnosis</b>            | <b>Test Findings</b>                                                                                                                                                     |
|-------------------------------------------------------------|--------------------------------------|--------------------------------------------------------------------------------------------------------------------------------------------------------------------------|
| <i>LDLR</i> ,<br><i>PCSK9</i> ,<br><i>APOB</i>              | Familial Hypercholesterolemia        | LDL $\geq$ 190 off cholesterol medications / $>$ 160 on cholesterol medications                                                                                          |
| <i>BRCA1</i><br><i>BRCA2</i>                                | HBOC                                 | Previous Diagnosis of breast or ovarian cancer                                                                                                                           |
| <i>PMS2</i>                                                 | Lynch Syndrome                       | Previous diagnosis of cancer                                                                                                                                             |
| <i>MYPBC3</i><br><i>MYH7</i><br><i>MYL3</i><br><i>TNNI3</i> | Hypertrophic/ Dilated Cardiomyopathy | Echocardiography with posterior LV, posterior wall thickness, or SW $>$ 12 mm, or echocardiography with LV diastolic diameter $>$ 6 cm and fractional shortening $<$ 20% |
| <i>DSC2</i><br><i>PKP2</i><br><i>DSP</i>                    | ARVC                                 | Echocardiography with abnormal RV or RA appearance                                                                                                                       |
| <i>KCNQ1</i><br><i>KCNE1</i><br><i>KCNH2</i>                | LQT Syndrome                         | ECG showing Q-T interval $>$ 460 ms in female and $>$ 450 ms in males                                                                                                    |
| <i>SCN5A</i>                                                | LQT Syndrome or Brugada Syndrome     | ECG showing Brugada type I pattern                                                                                                                                       |
| <i>CACNA1S</i>                                              | Hypokalemic Periodic Paralysis       | Potassium level $<$ 3.6 mmol/L with Periodic Paralysis                                                                                                                   |
| <i>PALB2</i>                                                | Breast, Ovarian or Pancreatic Cancer | MRI, CT scan, Mammogram or US evidence of related cancer                                                                                                                 |
| <i>CHEK2</i>                                                | Breast or Prostate Cancer            | MRI, CT scan, Mammogram or US evidence of related cancer                                                                                                                 |
| <i>APC</i>                                                  | Familial Adenomatous Polyposis       | MRI, CT scan, colonoscopy or US findings suggestive of FAP                                                                                                               |
| <i>RET</i>                                                  | MEN or associated tumors             | MRI, CT scan, or US findings suggestive MEN syndrome related neoplasia or lung cancer                                                                                    |

|                 |                                  |                                                                                                                                                           |
|-----------------|----------------------------------|-----------------------------------------------------------------------------------------------------------------------------------------------------------|
| <i>HFE Homo</i> | Hemochromatosis                  | Ferritin level > 200 ng/ml or Tranferritin SAT > 50%, Iron > 150 mcg/dL, TIBC < 250 mcg/dL<br>MRI, CT scan, or US findings suggestive of iron depositions |
| <i>F5</i>       | Factor V Leiden or thrombophilia | History of multiple venous thrombosis                                                                                                                     |
| <i>COL3A1</i>   | Ehlers-Danlos syndrome           | Imaging evidence of related arterial aneurysm or dissection.                                                                                              |
| <i>FBNI</i>     | Marfan Syndrome                  | Dilated aortic root on imaging                                                                                                                            |
| <i>ACADM</i>    | MCAD deficiency                  | —                                                                                                                                                         |
| <i>RYR1</i>     | Malignant Hyperthermia           | History of malignant hyperthermia with anesthesia                                                                                                         |

HBOC= Hereditary Breast and Ovarian Cancer; ARVC = arrhythmogenic right ventricular cardiomyopathy; LQTS = long QT syndrome; ECG = electrocardiogram; MRI = magnetic resonance imaging; US = ultrasound; CT = computed tomograph; CA 125 = cancer antigen 125; FAP = familial adenomatous polyposis; Tranferritin SAT = tranferritin saturation; TIBC = total iron binding capacity

**Table 4. 1-year Outcomes after Return of Results: In participants with previously known diagnoses**  
1

|                                       | <b>Overall<br/>n=18</b> | <b>Tier 1<br/>n=12</b> | <b>non-Tier 1<br/>n=6</b> | <b><i>P</i></b> |
|---------------------------------------|-------------------------|------------------------|---------------------------|-----------------|
| Age, years                            | 59.6 ± 6.9              | 59.8 ± 8               | 59.3 ± 1.5                | 0.8             |
| Female                                | 14 (77.8)               | 10 (83.3)              | 4 (66.6)                  | 0.56            |
| Family history                        | 14 (77.8)               | 12 (100)               | 2 (33.3)                  | 0.0049          |
| <b>Any outcome</b>                    | 16 (88.2)               | 12 (100)               | 4 (66.6)                  | 0.09            |
| <b>Process Outcomes</b>               |                         |                        |                           |                 |
| Referral to a specialist              | 14 (77.8)               | 11 (91.7)              | 3 (50)                    | 0.083           |
| Investigations based on RoR           | 15 (83.3)               | 11 (91.7)              | 4 (66.6)                  | 0.24            |
| Surveillance initiated                | 9 (50)                  | 8 (66.7)               | 1 (16.6)                  | 0.13            |
| <b>Intermediate Outcomes</b>          |                         |                        |                           |                 |
| New tests finding                     | 6 (33.3)                | 3 (25)                 | 3 (50)                    | 0.34            |
| New diagnosis                         | 14 (77.7)               | 11 (91.7)              | 3(50)                     | 0.08            |
| <b>Clinical Outcomes</b>              |                         |                        |                           |                 |
| Risk reduction surgery                | 8 (44.4)                | 8 (66.7)               | 0                         | 0.012           |
| Medication or therapy started/altered | 5 (27.8)                | 1 (8.3)                | 4 (66.6)                  | 0.021           |

Age is presented as mean ± standard deviation; the remaining features are presented as n (percentage)



## Detailed description of outcomes

### Tier 1 conditions

*Familial Hypercholesterolemia (FH) (LDLR, APOB, PCSK9).* FH variants were returned to 18 participants who were not previously aware of a genetic diagnosis. Each carried a previous diagnosis of hypercholesterolemia, however only one was previously diagnosed with FH. In those already diagnosed with hypercholesterolemia, RoR prompted further investigations (n=10), modifications to therapy (n=3) or periodic surveillance (n=4) (**Table 3 and Figure 1**). Tests performed based on RoR included lipid panel (n=9), apolipoprotein B (n=6), lipoprotein(a) (n=5), ECG (n=7), stress echocardiogram (n=2) and CT coronary calcium scan (n=4). Changes in the drug therapy included starting/restarting a statin (n=1), increasing statin dosage (n=1), and adding ezetimibe (n=1). Referral to the FH clinic was declined by 9 participants who were already being managed for hypercholesterolemia by their respective primary care physician or specialist.

**Table 5. Outcomes in participants with FH P/LP variants**

|                                                   | <i>Process Outcomes</i><br><i>n = 10</i>                |                                                                                                                                     |                                     | <i>Clinical Outcomes</i><br><i>n = 3</i>           |
|---------------------------------------------------|---------------------------------------------------------|-------------------------------------------------------------------------------------------------------------------------------------|-------------------------------------|----------------------------------------------------|
| <i>Gene</i><br><i>(18</i><br><i>Participants)</i> | <i>Referred to</i><br><i>Specialist</i><br><i>n = 9</i> | <i>Tests Performed</i><br><i>n = 10</i>                                                                                             | <i>Surveillance</i><br><i>n = 4</i> | <i>Change in Therapy</i><br><i>n = 3</i>           |
| <i>LDLR</i><br>n = 14<br>6 male<br>8 female       | 6                                                       | (7 participants)<br>Lipid Panel (6)<br>ECG (5)<br>Lipoprotein (a) (3)<br>Apo B (4)<br>CT Coronary Calcium<br>(2)<br>Stress Echo (2) | 2                                   | Statin dose increased (1)<br>Ezetimibe started (2) |
| <i>APOB</i><br>n = 3<br>2 male<br>1 female        | 2                                                       | (2 participants)<br>Lipid Panel (2)<br>Lipoprotein (a) (1)<br>Apo B (1)<br>CT Coronary Calcium<br>(1) ECG (1)                       | 1                                   |                                                    |
| <i>PCSK9</i><br>n = 1<br>Female                   | 1                                                       | Lipid Panel (1)<br>Lipoprotein (a) (1)<br>Apo B (1)<br>CT Coronary Calcium<br>(1) ECG (1)                                           | 1                                   |                                                    |

FH = familial hypercholesterolemia; Apo B = Apolipoprotein B; ECG = electrocardiogram; Echo = echocardiogram

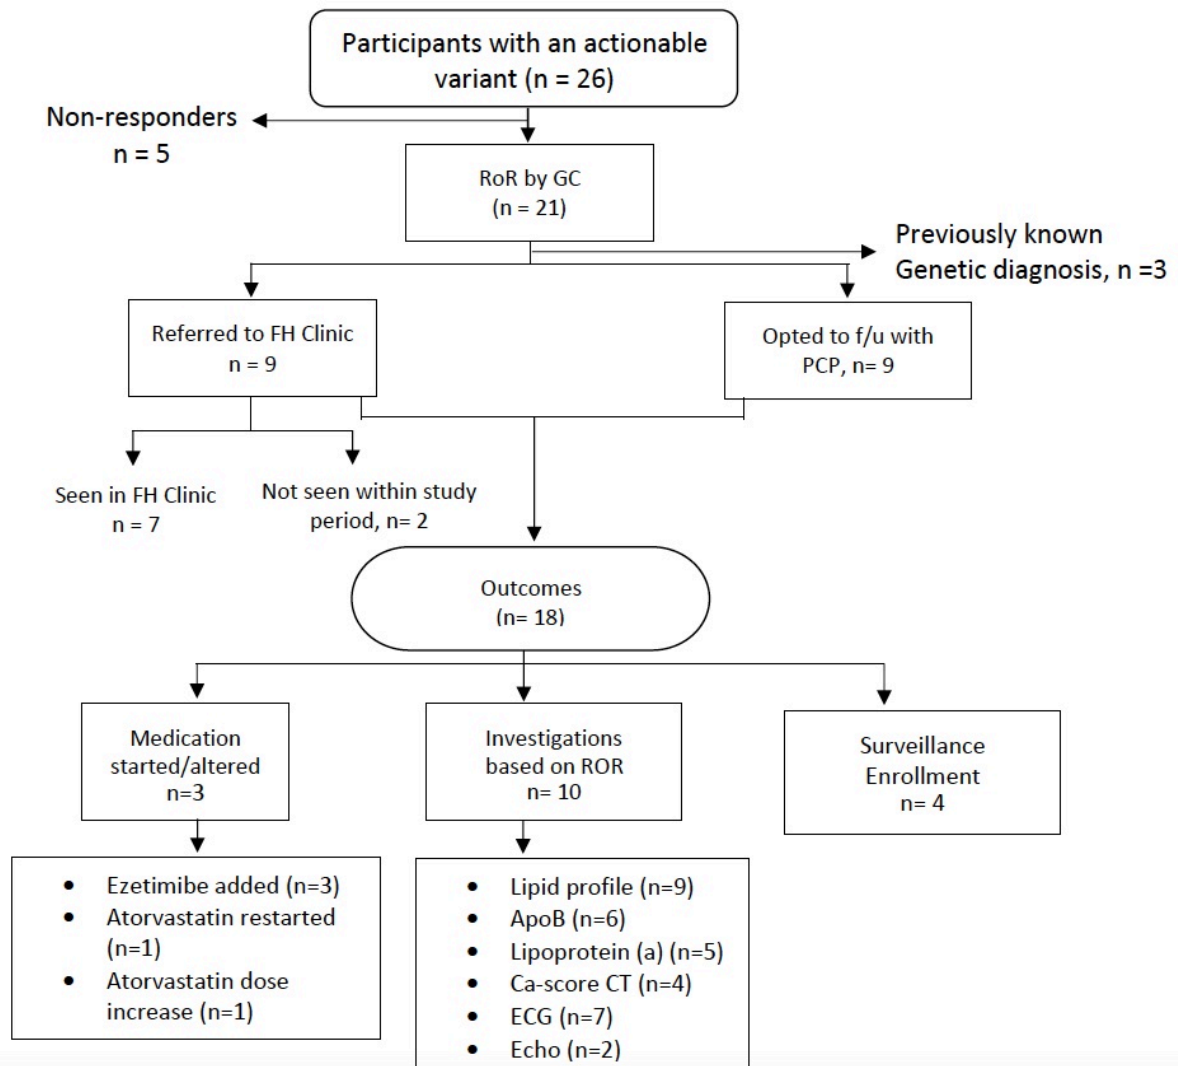

**Figure 1. Outcomes in 26 participants with P/LP Familial Hypercholesterolemia (FH) variants**

RoR= return of results; GC = genetic counselor; f/u = follow up; PCP = primary care provider; FH = familial hypercholesterolemia; Apo B = Apolipoprotein B; Ca-score CT = Computed tomography coronary calcium; ECG = electrocardiogram; Echo = echocardiogram

*Lynch Syndrome.* Lynch syndrome variants were returned to 10 participants who did not previously know their result: *MSH6* (n=2) and *PMS2* (n=8) (**Table 4 and Figure 2**). Within the year after RoR, 7 of these participants had a colonoscopy and 3 female participants underwent prophylactic hysterectomy and bilateral salphingo-oophorectomy (BSO). Of the two participants with a P/LP *MSH6* variant, one had previous bilateral BSO due to endometriosis and opted to follow with her PCP for further management. The second was referred to the high-risk gastrointestinal neoplasia clinic but had yet to complete the follow-up. Of 8 participants with P/LP *PMS2* variants, 5 female participants were referred to a high-risk gastrointestinal neoplasia clinic and to a high-risk gynecology clinic. One participant canceled her referral and saw her PCP instead. Three participants underwent hysterectomy and BSO. One had previously undergone a hysterectomy and bilateral BSO due to endometriosis not related to genetic testing. These participants completed colonoscopy (n=3), transvaginal pelvic ultrasound (n=2), urine cytology (n=2), and were enrolled in yearly surveillance colonoscopy and urine cytology. Of the 3 male *PMS2* participants, 1 declined referral and the remaining 2 were enrolled in yearly surveillance colonoscopy and urine cytology.

**Table 6. Outcomes in participants with Lynch Syndrome P/LP variants**

|                                           | <i>Process Outcomes</i><br><i>n = 9</i>       |                                                                                                 |                                     | <i>Clinical Outcomes</i><br><i>n = 3</i>              |
|-------------------------------------------|-----------------------------------------------|-------------------------------------------------------------------------------------------------|-------------------------------------|-------------------------------------------------------|
| <i>Gene (10 Participants)</i>             | <i>Referred to Specialist</i><br><i>n = 9</i> | <i>Tests Performed</i><br><i>n = 8</i>                                                          | <i>Surveillance</i><br><i>n = 8</i> | <i>Risk Reduction surgery</i><br><i>n = 3</i>         |
| <i>MSH6</i><br>n= 2<br>1 Male<br>1 Female | 2                                             | (1 participant)<br>Colonoscopy (1)<br>Upper Gastrointestinal endoscopy (1)                      | 1                                   | 0                                                     |
| <i>PMS2</i><br>n= 8<br>3 Male<br>5 Female | 7                                             | (7 participants)<br>Colonoscopy (6)<br>Transvaginal Pelvic Ultrasound (2)<br>Urine Cytology (2) | 7                                   | Hysterectomy and bilateral salphingo-oophorectomy (3) |

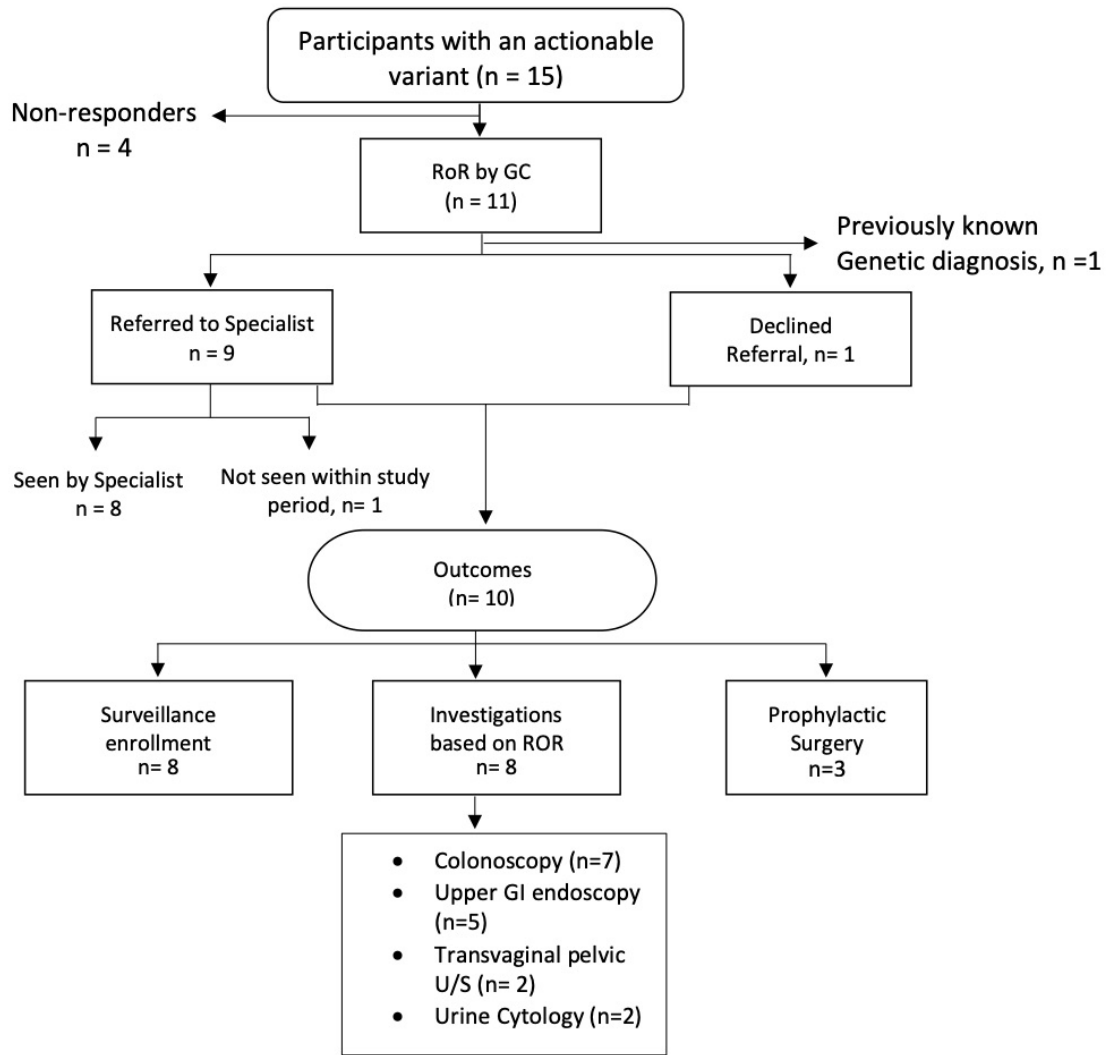

**Figure 2. Outcomes in 15 participants with P/LP Lynch Syndrome variants**  
 RoR= return of results; GC = genetic counselor; GI= gastrointestinal

*Hereditary Breast and Ovarian Cancer (HBOC)*

HBOC variants (*BRCA1*, *BRCA2*) were returned to 8 participants who did not previously know their result (3 females and 5 males) (**Table 5 and Figure 3**). All 3 female participants underwent prophylactic surgery based on RoR. One *BRCA1* participant (c.5109T>G) had a previous unrelated hysterectomy and BSO for a Lynch syndrome diagnosis and completed bilateral mastectomy based on RoR. The 2 remaining female *BRCA2* participants both underwent BSO and bilateral mastectomy. Of the 5 male participants, 3 were referred to a specialist and 2 opted to see their PCP instead. Of the male participants, 2 underwent prostate cancer screening tests including prostate rectal exam and PSA.

**Table 7. Outcomes in participants with HBOC Syndrome P/LP variants**

| <i>Gene</i><br>(9 participants)                                 | <i>Process Outcomes</i><br><i>n = 6</i> |                                                                              |                              | <i>Clinical Outcomes</i><br><i>n = 3</i> |
|-----------------------------------------------------------------|-----------------------------------------|------------------------------------------------------------------------------|------------------------------|------------------------------------------|
|                                                                 | Referred to Specialist<br><i>n = 5</i>  | Tests Performed<br><i>n = 6</i>                                              | Surveillance<br><i>n = 6</i> | Risk Reduction surgery<br><i>n = 3</i>   |
| <i>BRCA1</i><br><i>n= 1</i><br><i>1 Female</i>                  | 1                                       | (1 participant)<br>Mammogram (1)<br>MRI Breast (1)                           | 1                            | 1<br>Mastectomy (1)                      |
| <i>BRCA2</i><br><i>n= 7</i><br><i>5 Male</i><br><i>2 Female</i> | 4                                       | (5 participants)<br>MRI Breast (2)<br>Ca 125 (1)<br>Pelvic US (1)<br>PSA (2) | 5                            | 2<br>Mastectomy (2)                      |

CA 125 = cancer antigen 125; US = ultrasound; PSA = prostate specific antigen

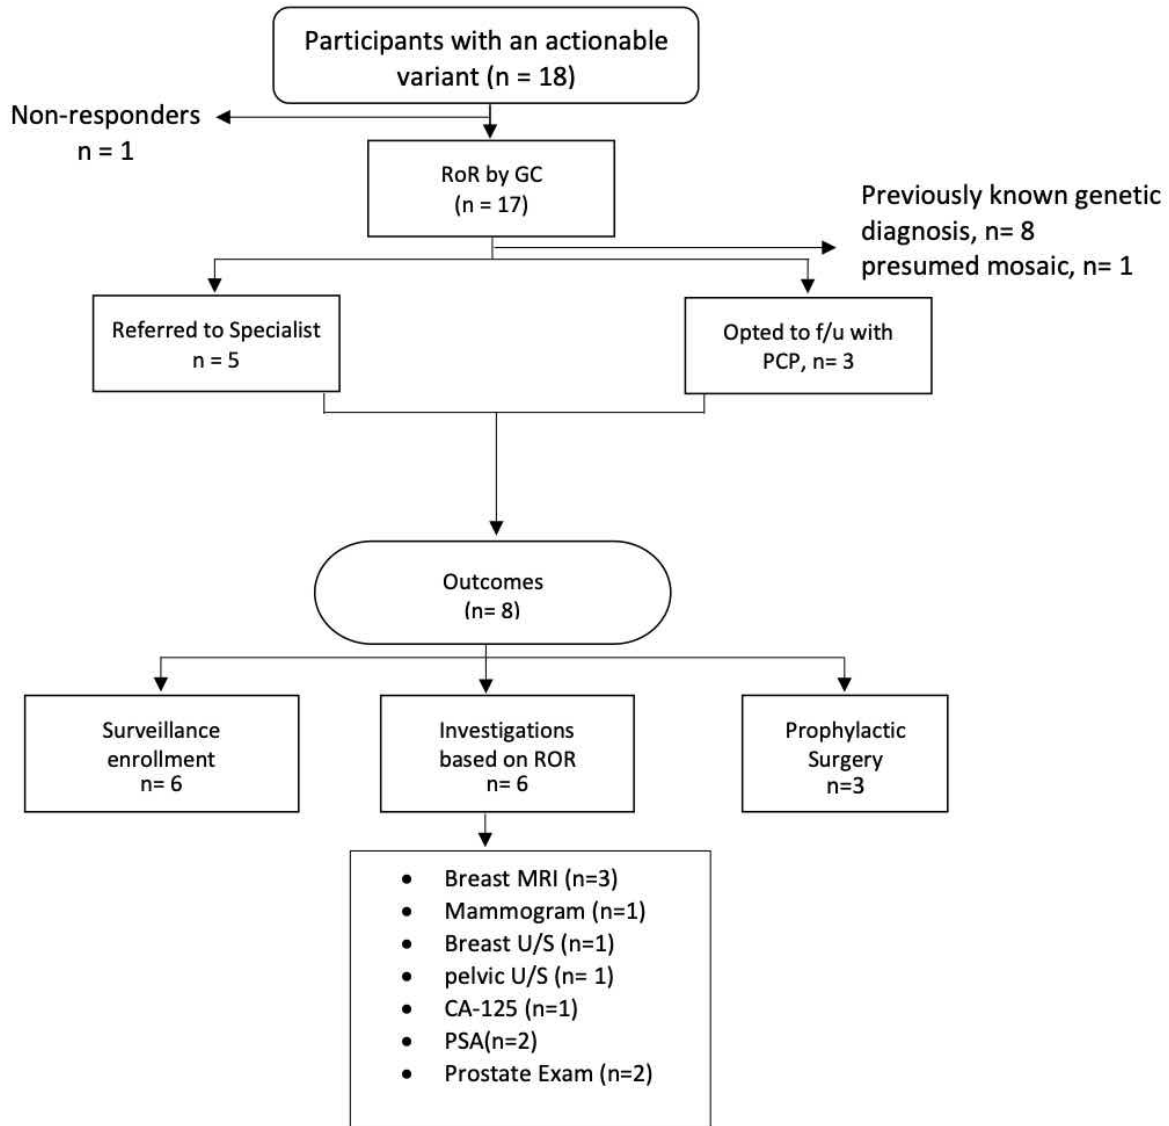

**Figure 3. Outcomes in 18 participants with P/LP HBOC Syndrome variants**

RoR= return of results; GC = genetic counselor; f/u = follow up; PCP = primary care provider; MRI= magnetic resonance imaging; U/S= ultrasound; CA 125 = cancer antigen 125; US = ultrasound; PSA = prostate specific antigen

**Non-Tier 1 conditions**

*Long QT-Syndrome and Brugada Syndrome.* P/LP arrhythmia variants were returned to 10 participants who did not previously know their result: (*KCNQ1* (n=4), *KCNE1*(n=2), *SCN5A*(n=2) and *KCNH2* (n=2)) (Table 6 and Figure 4). Of the *KCNQ1* variants, one (c.1552C>T) underwent testing (ECG, 24h Holter, echocardiogram, exercise stress test) and had a prolonged QT consistent with LQTS. A second participant (Del Exons 4-7) underwent similar testing but was deemed non-penetrant. Of the remaining two, one (c.776G>A) had been previously identified as having LQTS and was known to the EP clinic, the other participant (c.1893dup) had multiple normal ECG tracings and was referred to EP clinic but had not been seen during the study follow-up period. None of those four participants had an indication of the disease in their family. Two participants with P/LP *KCNE1* variants had QT prolongation on previous ECGs and were referred to an electrophysiologist. One (c.292C>T) was started on a β-blocker by the electrophysiologist (having a family history of asymptomatic prolonged Q-T interval in her mother and of an aunt who died in infancy) and precautionary measures were advised for the other (c.226G>A) whose family history was remarkable for paternal uncle who died in childhood. Both *SCN5A* (Type 1 Brugada/Type 3 LQTS) variant positive participants (c.4886G>A) and (c.3956G>T) were assessed by an electrophysiologist. Triplicate ECGs with the Brugada protocol as well as a 24-h Holter monitor showed no evidence of Brugada patterns in both participants. The participant with (c.4886G>A) had a family history of sudden death in one of her cousins in his 50s, however no pertinent family history was present in the other participant (c.3956G>T). It was felt that QT precautionary measures were not necessary however they were advised to follow Brugada precautions including avoidance of Brugada-aggravating medications, fever reduction and avoidance, as well as avoidance of excess alcohol and drugs such as marijuana and cocaine. One participant with a *KCNH2* variant (c.2762delG) was referred to EP clinic and underwent ECG, echocardiogram and Holter monitor, and was found to have a prolonged QT interval and notched T waves consistent with Long-QT syndrome type 2. Her medications were reviewed and found to be safe for her condition. Her family history was positive for asymptomatic prolongation of QT interval in her mother. She was advised to follow preventative measures include water and electrolyte replenishment especially in the setting of vomiting or diarrhea. Follow-up appointments were scheduled after 3 and 6 months. The other participant with *KCNH2* variant (c.1468G>A) had borderline Q-T prolongation on previous ECGs, she was referred to the EP clinic but had not been seen in the follow-up period. Her family history was unremarkable.

**Table 8. Outcomes in participants with Long QT/Brugada Syndrome P/LP variants**

| <i>Gene</i><br>(10<br>Participants)         | <i>Process Outcomes</i><br>n = 9   |                                                                                         |                       | <i>Clinical Outcomes</i><br>n = 1 |
|---------------------------------------------|------------------------------------|-----------------------------------------------------------------------------------------|-----------------------|-----------------------------------|
|                                             | Referred to<br>Specialist<br>n = 9 | Tests Performed<br>n = 8                                                                | Surveillance<br>n = 1 | Change in Therapy<br>n = 1        |
| <i>KCNQ1</i><br>n = 4<br>2 male<br>2 female | 4                                  | (4 participant)<br>Exercise Test (2)<br>ECG (4)<br>24h Holter (2)<br>Echocardiogram (2) | 0                     | 0                                 |
| <i>KCNE1</i><br>n = 2<br>2 female           | 2                                  | (1 participants)<br>Exercise Test (1)<br>ECG (1)                                        |                       | 1<br>Nadolol started (1)          |

|                                   |   |                                                                                                                                                 |   |   |
|-----------------------------------|---|-------------------------------------------------------------------------------------------------------------------------------------------------|---|---|
| <i>SCN5A</i><br>n = 2<br>2 female | 2 | (2 participants)<br>24h Holter (2)<br>ECG (2)<br>Brugada Protocol ECG (2)<br>Signal-Averaged ECG (2)<br>Exercise Test (1)<br>Echocardiogram (1) | 0 | 0 |
| <i>KCNH2</i><br>n = 2<br>2 female | 1 | (1 participants)<br>24h Holter (1)<br>ECG (1)<br>Exercise Test (1)<br>Echocardiogram (1)                                                        | 0 |   |

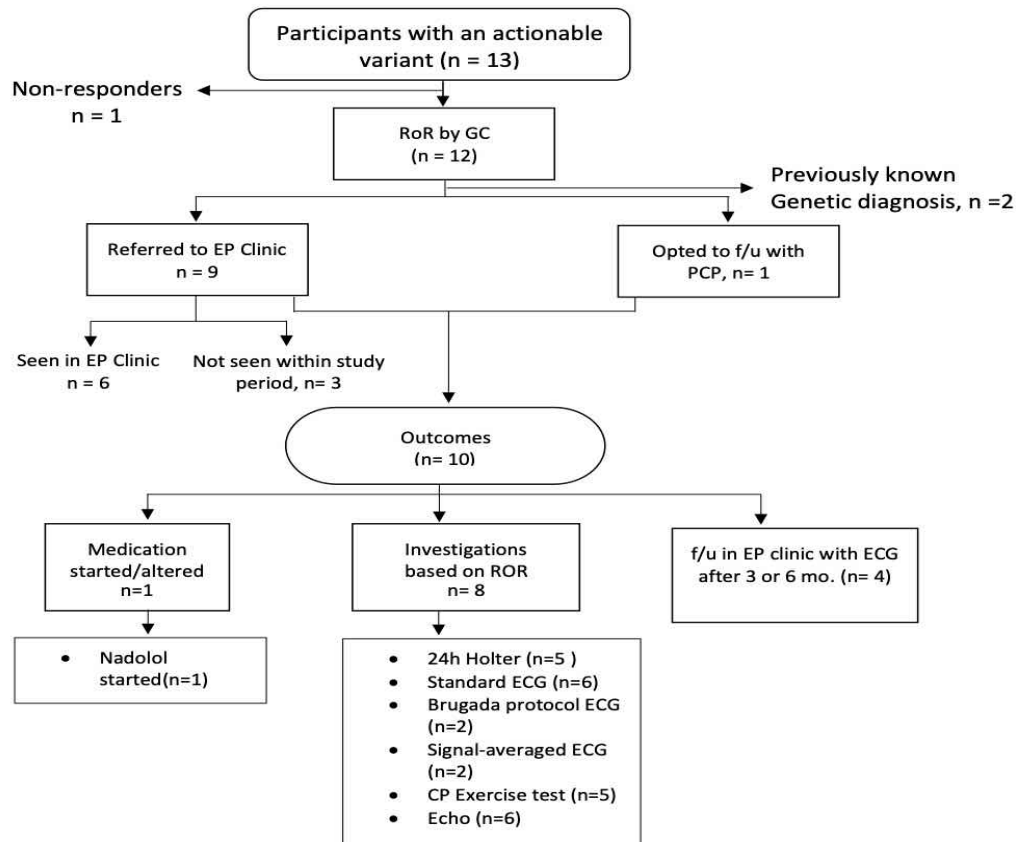

**Figure 4. Outcomes in 13 participants with P/LP Long-QT/Brugada Syndrome variants**

RoR= return of results; GC = genetic counselor; f/u = follow up; PCP = primary care provider; EP= electrophysiology; ECG = electrocardiogram; CP= cardiopulmonary; Echo = echocardiogram



**Cardiomyopathy.** Seven participants had P/LP variants associated with cardiomyopathy: *MYBPC3* (n=3), *TNNI3* (n=2), *MYH7* (n=1), *MYL3* (n=1). Two participants with the *MYBPC3* (c.1504C>T) variant underwent ECG and echocardiogram, and one completed cardiac MRI. No phenotypic manifestations of hypertrophic cardiomyopathy were noted and both participants were recommended periodic surveillance with echocardiograms. The remaining participant with *MPBPC3* (c.905+1G>T) was referred to the Hypertrophic Cardiomyopathy clinic, but declined follow-up, and no related phenotypic data were available in the EHR. A participant with a *TNNI3* variant (c.497C>T) underwent an ECG, echocardiogram and cardiac MRI and was noted to have nonspecific T-wave ECG changes and a thickened basal septum (14 mm) on MRI. There was no family or personal history of syncope or sudden cardiac death. He was initiated on  $\beta$ -blocker therapy and recommended yearly echocardiograms. Another *TNNI3* participant with the c.484C>T variant underwent an ECG and echocardiogram with strain measurement, which were normal, and the variant was deemed to be non-penetrant. It was concluded that this participant did not require further follow-up unless he developed any cardiac symptoms. A participant with an *MYH7* variant (c.4499G>A) had previous normal ECGs and echocardiograms and was referred to hypertrophic cardiomyopathy clinic for further investigations. Evaluation was not completed in the follow-up period. A participant in her mid 60's with a pathogenic (later downgraded to VUS) *MYL3* variant (c.170C>G) had previous normal echocardiograms and was referred to hypertrophic cardiomyopathy clinic for further investigations. She had a family history of sudden death in one of her cousins. Given her normal tests and lack of symptoms, it was determined that the risk of *MYL3*-mediated cardiomyopathy is extremely low in this patient. No precautionary measures were recommended.

**Arrhythmogenic Right Ventricular Dysplasia (ARVC).** Four participants had P/LP variants returned which were associated with ARVC in the form of *DSC2* (1), *DSP* (1) and *PKP2* (2). The first *PKP2* participant (c.275T>A) was referred to the arrhythmia clinic and underwent ECG, exercise stress testing, echocardiogram and cardiac MRI; no abnormalities were detected but longitudinal three-yearly surveillance with repeat ECG, echocardiogram, exercise stress test and cardiac MRI was recommended. The second *PKP2* participant (c.1162C>T) was noted to have a previously normal ECG and echocardiogram and declined referral to EP clinic. The *DSC2* participant (c.2125+1del) was seen by an electrophysiologist and underwent an ECG, echocardiogram, exercise stress test and cardiac MRI; all testing was within normal limits. The patient was enrolled in longitudinal five-yearly surveillance with repeat testing. The *DSP* participant (c.597\_598insGTAA) was referred to cardiovascular specialist and in addition to ECG, he underwent signal-averaged ECG, 24-h Holter monitor, echocardiogram and exercise stress test. His Holter monitor showed 4 episodes of atrial fibrillation. Upon review in EP clinic, no signs of ARVC were identified and his atrial fibrillation was thought to be unrelated to his genetic results. He continued to follow up with his cardiologist for management of atrial fibrillation and was started on beta-blockers. No anticoagulation was initiated since the CHADS2VASC was 1.

**Table 9. Outcomes in participants with Cardiomyopathy P/LP variants**

| <i>Gene</i><br>(11<br>Participants)          | <i>Process Outcomes</i><br>n = 8   |                                                                                                      |                       | <i>Clinical Outcomes</i><br>n = 1 |
|----------------------------------------------|------------------------------------|------------------------------------------------------------------------------------------------------|-----------------------|-----------------------------------|
|                                              | Referred to<br>Specialist<br>n = 8 | Tests Performed<br>n = 7                                                                             | Surveillance<br>n = 5 | Change in Therapy<br>n = 1        |
| <i>MYBPC3</i><br>n = 3<br>2 male<br>1 female | 2                                  | (2 participant)<br>Echocardiogram with<br>strain (2)<br>ECG (1)<br>24h Holter (1)<br>Cardiac MRI (1) | 2                     | 0                                 |

|                                             |   |                                                                                                                             |   |                                           |
|---------------------------------------------|---|-----------------------------------------------------------------------------------------------------------------------------|---|-------------------------------------------|
| <i>TNNI3</i><br>n = 2<br>1 male<br>1 female | 2 | (2 participants)<br>Echocardiogram with strain (2)<br>ECG (2)<br>24h Holter (1)<br>Cardiac MRI (1)                          | 2 | 1<br>Verapamil switched to Metoprolol (1) |
| <i>MYH7</i><br>n = 1<br>1 female            | 1 | 0                                                                                                                           | 0 |                                           |
| <i>MYL3</i><br>n = 1<br>1 female            | 1 |                                                                                                                             |   |                                           |
| <i>PKP2</i><br>n = 2<br>1 male<br>1 female  | 1 | Standard ECG (1)<br>Signal-Averaged ECG (1)<br>Exercise Test (1)<br>Echocardiogram (1)<br>24h Holter (1)<br>Cardiac MRI (1) | 0 |                                           |
| <i>DSC2</i><br>n = 1<br>1 male              | 1 | Standard ECG (1)<br>Exercise Test (1)<br>Echocardiogram (1)<br>24h Holter (1)<br>Cardiac MRI (1)                            | 0 |                                           |
| <i>DSP</i><br>n = 1<br>1 male               | 1 | Standard ECG (1)<br>Signal-Averaged ECG (1)<br>Exercise Test (1)<br>Echocardiogram (1)<br>24h Holter (1)                    | 0 |                                           |

*Hemochromatosis.* Hereditary Hemochromatosis findings were returned to eight participants (3 males, 5 females) who were homozygous for the *HFE* c.845G>A variant and did not previously know their result (**Table 5 and Figure 5**). Of these, 3 were referred to Department of Gastroenterology and the remaining 5 opted to follow up with their PCP. Of the 3 participants referred to Department of Gastroenterology, 2 underwent iron overload investigations including ferritin level, liver elastography and cardiac MRI. One of these participants also completed additional genetic testing which reconfirmed the finding. Evidence of abnormal iron accumulation was noted in both participants and they were started on therapeutic phlebotomy with periodic surveillance. The third participant was not seen in the Department of Gastroenterology during our study follow-up period. Of the 5 participants who were referred to their PCPs, 1 was found to have abnormal iron profile and was started on therapeutic phlebotomy. Three of the remaining 4 had a normal iron profile and periodic surveillance was initiated in 2 of them. The remaining participant had not been evaluated by their PCP during the study follow-up period.

**Table 10. Outcomes in participants with Hereditary Hemochromatosis P/LP variants**

|                                 | <i>Process Outcomes</i><br>n = 8 |                          |                       | <i>Clinical Outcomes</i><br>n = 4 |
|---------------------------------|----------------------------------|--------------------------|-----------------------|-----------------------------------|
| <i>Gene</i><br>(8 Participants) | Referred to Specialist<br>n = 3  | Tests Performed<br>n = 7 | Surveillance<br>n = 3 | Change in Therapy<br>n = 3        |

|                                           |   |                                                                                     |   |                                       |
|-------------------------------------------|---|-------------------------------------------------------------------------------------|---|---------------------------------------|
| <i>HFE</i><br>n = 9<br>3 male<br>5 female | 3 | (7 participant)<br>Iron studies (8)<br>Liver MRI (3)<br>Cardiac MRI (1)<br>LFTs (3) | 3 | Therapeutic Phlebotomy<br>Started (3) |
|-------------------------------------------|---|-------------------------------------------------------------------------------------|---|---------------------------------------|

MRI = magnetic resonance imaging; LFTs = liver function tests

**Figure-1 Flowsheet for Hemochromatosis**

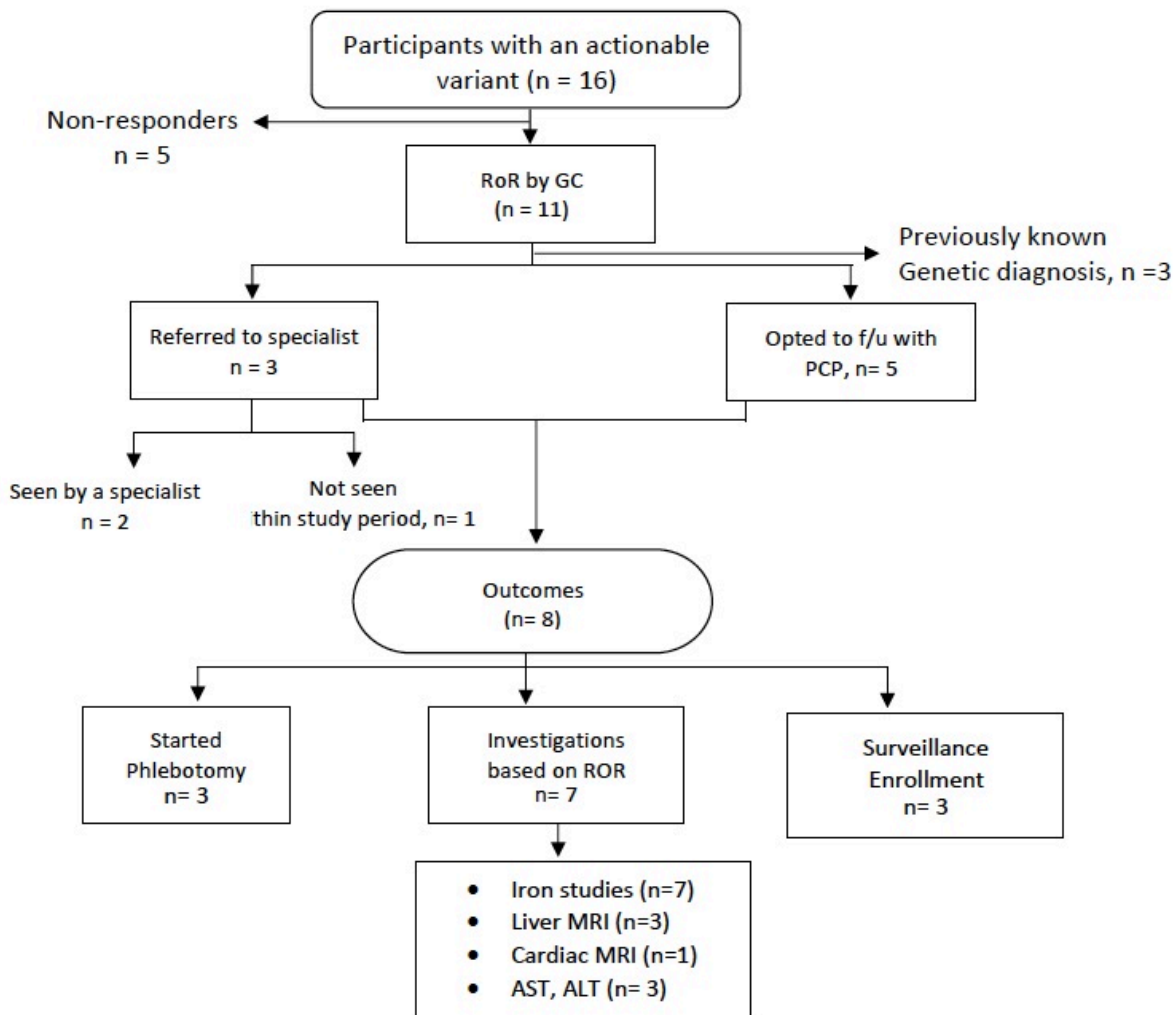

**Figure 5. Outcomes in 16 participants with Hereditary Hemochromatosis P/LP variants**

RoR= return of results; GC = genetic counselor; f/u = follow up; PCP = primary care provider; MRI = magnetic resonance imaging; AST= aspartate aminotransferase; ALT= alanine transaminase

*Factor V Leiden (Homozygous).* Of the four participants homozygous for Factor V Leiden *F5* (c.1601G>A), two were referred for further management to their PCP. Neither had a personal history of venous thromboembolism. One participant had a history of deep venous thrombosis and was reviewed by a vascular medicine specialist and subsequently commenced on prophylactic dose rivaroxaban. One participant in addition had an actionable variant in *RET* proto-oncogene and was referred to endocrinology for further management. He had not been seen by endocrinology specialist within the study follow-up period.

*Ehlers-Danlos Syndrome, vascular type.* A participant in her 60's with a P/LP variant in *COL3A1* (c.4087C>T) was referred to clinical genetics for further assessment. A first degree relative had been diagnosed with spontaneous coronary artery dissection in the 3rd decade of life and was diagnosed with a "connective tissue" disorder but no further details were available. She failed to follow-up within the study follow-up period.

*Multiple Endocrine Neoplasia IIA (MENIIA).* A participant in their late 60's with a P/LP *RET* (c.2410G>A) proto-oncogene was referred to an endocrinologist and underwent measurement of serum calcitonin, parathyroid hormone, calcium, albumin and vitamin D, as well as 24-hour urine catecholamines and metanephrines, as well as an ultrasound thyroid. These investigations were within normal limits and no further follow-up was planned. A second participant with a P/LP *RET* variant (c.2370G>T) was also homozygous mutation for Factor V Leiden (described above) and referred to an endocrinologist for further management. His lab results came back within normal limits and it was decided that there is no clear benefit of prophylactic thyroidectomy at this time, he was enrolled in annual surveillance.

*Familial adenomatous polyposis (FAP).* *APC* P/LP variants were found in two participants who were not previously aware of the result. The first was thought to have a mosaic variant (c.1262G>A) due to a previously normal colonoscopy in their 50's; upper gastrointestinal endoscopy was completed and showed no polyps. This participant was referred to their PCP to coordinate surveillance. The other participant had a variant (c.3920T>A) that does not cause FAP but is a well characterized risk factor for colon cancer especially in individuals with Ashkenazi Jewish background. This participant had an adenomatous colon polyp identified on previous colonoscopy. Surveillance colonoscopy every 5 years was coordinated by her PCP.

*Malignant Hyperthermia.* A P/LP variant in *RYR2* gene (c.1840C>T) indicating predisposition to malignant hyperthermia was detected in a participant sample. This participant had no anesthesia complications previously. Following RoR, an anesthesia alert was placed in a participant's EHR. She was advised to avoid extreme heat but athletic activity was not restricted.

*Medium-chain acyl-CoA dehydrogenase (MCAD) deficiency.* A participant homozygous for a P/LP *ACADM* variant (c.997A>G) was referred to clinical genomics for follow-up. In addition, it was recommended that her family members speak with their doctors about testing options to rule out the possibility of having MCAD. This participant had a grandchild who possibly had MCAD. She had not been seen by clinical genomics within the study follow-up period.

*Other cancer associated variants.* A male participant with a P/LP (*PALB2*) variant (c.172\_175delTTGT) was referred to his PCP for screening. A female participant with a P/LP (*PALB2*) variant (c.2748+1G>T) had a previous history of breast cancer (treated with wide local excision and tamoxifen) and was referred to the breast cancer clinic. A mammogram was ordered, and no signs of recurrence or new cancer were observed; she continued to follow-up in the breast cancer clinic. A female with a *CHEK2* P/LP variant (Del Exons 9-10) had a previous history of breast cancer but had her surveillance escalated from a yearly mammogram to a yearly mammogram, bilateral breast MRI and colonoscopy every 5 years. A male with a *CHEK2* P/LP variant (Deletion Exons 1-15) had history of prostate cancer in his 40's and underwent

radical prostatectomy. In addition, he had hyperplastic polyps on previous colonoscopies. Two brothers had prostate cancer in their 50's and a sister died of colon cancer in her 50's. Given his past medical history, he was already followed by specialist and no referral was necessary.

STROBE Statement—Checklist of items that should be included in reports of *cross-sectional studies*

|                              | <b>Item No</b> | <b>Recommendation</b>                                                                                                                                                                                                                                                                                                                                                                                         |
|------------------------------|----------------|---------------------------------------------------------------------------------------------------------------------------------------------------------------------------------------------------------------------------------------------------------------------------------------------------------------------------------------------------------------------------------------------------------------|
| <b>Title and abstract</b>    | 1              | (a) Indicate the study's design with a commonly used term in the title or the abstract<br>(b) Provide in the abstract an informative and balanced summary of what was done and what was found                                                                                                                                                                                                                 |
| <b>Introduction</b>          |                |                                                                                                                                                                                                                                                                                                                                                                                                               |
| Background/rationale         | 2              | Explain the scientific background and rationale for the investigation being reported                                                                                                                                                                                                                                                                                                                          |
| Objectives                   | 3              | State specific objectives, including any prespecified hypotheses                                                                                                                                                                                                                                                                                                                                              |
| <b>Methods</b>               |                |                                                                                                                                                                                                                                                                                                                                                                                                               |
| Study design                 | 4              | Present key elements of study design early in the paper                                                                                                                                                                                                                                                                                                                                                       |
| Setting                      | 5              | Describe the setting, locations, and relevant dates, including periods of recruitment, exposure, follow-up, and data collection                                                                                                                                                                                                                                                                               |
| Participants                 | 6              | (a) Give the eligibility criteria, and the sources and methods of selection of participants                                                                                                                                                                                                                                                                                                                   |
| Variables                    | 7              | Clearly define all outcomes, exposures, predictors, potential confounders, and effect modifiers. Give diagnostic criteria, if applicable                                                                                                                                                                                                                                                                      |
| Data sources/<br>measurement | 8*             | For each variable of interest, give sources of data and details of methods of assessment (measurement). Describe comparability of assessment methods if there is more than one group                                                                                                                                                                                                                          |
| Bias                         | 9              | Describe any efforts to address potential sources of bias                                                                                                                                                                                                                                                                                                                                                     |
| Study size                   | 10             | Explain how the study size was arrived at                                                                                                                                                                                                                                                                                                                                                                     |
| Quantitative variables       | 11             | Explain how quantitative variables were handled in the analyses. If applicable, describe which groupings were chosen and why                                                                                                                                                                                                                                                                                  |
| Statistical methods          | 12             | (a) Describe all statistical methods, including those used to control for confounding<br>(b) Describe any methods used to examine subgroups and interactions<br>(c) Explain how missing data were addressed<br>(d) If applicable, describe analytical methods taking account of sampling strategy<br>(e) Describe any sensitivity analyses                                                                    |
| <b>Results</b>               |                |                                                                                                                                                                                                                                                                                                                                                                                                               |
| Participants                 | 13*            | (a) Report numbers of individuals at each stage of study—eg numbers potentially eligible, examined for eligibility, confirmed eligible, included in the study, completing follow-up, and analysed<br>(b) Give reasons for non-participation at each stage<br>(c) Consider use of a flow diagram                                                                                                               |
| Descriptive data             | 14*            | (a) Give characteristics of study participants (eg demographic, clinical, social) and information on exposures and potential confounders<br>(b) Indicate number of participants with missing data for each variable of interest                                                                                                                                                                               |
| Outcome data                 | 15*            | Report numbers of outcome events or summary measures                                                                                                                                                                                                                                                                                                                                                          |
| Main results                 | 16             | (a) Give unadjusted estimates and, if applicable, confounder-adjusted estimates and their precision (eg, 95% confidence interval). Make clear which confounders were adjusted for and why they were included<br>(b) Report category boundaries when continuous variables were categorized<br>(c) If relevant, consider translating estimates of relative risk into absolute risk for a meaningful time period |
| Other analyses               | 17             | Report other analyses done—eg analyses of subgroups and interactions, and sensitivity analyses                                                                                                                                                                                                                                                                                                                |

| <b>Discussion</b>        |    |                                                                                                                                                                            |
|--------------------------|----|----------------------------------------------------------------------------------------------------------------------------------------------------------------------------|
| Key results              | 18 | Summarise key results with reference to study objectives                                                                                                                   |
| Limitations              | 19 | Discuss limitations of the study, taking into account sources of potential bias or imprecision. Discuss both direction and magnitude of any potential bias                 |
| Interpretation           | 20 | Give a cautious overall interpretation of results considering objectives, limitations, multiplicity of analyses, results from similar studies, and other relevant evidence |
| Generalisability         | 21 | Discuss the generalisability (external validity) of the study results                                                                                                      |
| <b>Other information</b> |    |                                                                                                                                                                            |
| Funding                  | 22 | Give the source of funding and the role of the funders for the present study and, if applicable, for the original study on which the present article is based              |

\*Give information separately for exposed and unexposed groups.

**Note:** An Explanation and Elaboration article discusses each checklist item and gives methodological background and published examples of transparent reporting. The STROBE checklist is best used in conjunction with this article (freely available on the Web sites of PLoS Medicine at <http://www.plosmedicine.org/>, Annals of Internal Medicine at <http://www.annals.org/>, and Epidemiology at <http://www.epidem.com/>). Information on the STROBE Initiative is available at [www.strobe-statement.org](http://www.strobe-statement.org).
